# Supplementary material for: Bias in comparisons of mortality among very preterm births: A cohort study
Source: PLOS journal article supplement (doi:10.1371/journal.pone.0253931), 2021-06-30
Supplement: S7 (10.1371/journal.pone.0253931.s007) [file journal.pone.0253931.s007]

**S1 Table. Comparisons of rates of early neonatal death rates at 24-31 weeks' gestation and overall among singletons with no congenital or chromosomal anomaly, 2006-2015.**

|                                                        | Rate<br>at <b>24-31 weeks</b> (95% CI)                                       |                     | Rate<br>at <b>24-31 weeks</b> (95% CI)                                     |                     | Rate,<br><b>overall</b> (95% CI)      |                     |
|--------------------------------------------------------|------------------------------------------------------------------------------|---------------------|----------------------------------------------------------------------------|---------------------|---------------------------------------|---------------------|
|                                                        | Births-based calculation<br>(per 1,000 total births/<br>births) <sup>a</sup> | RR (95% CI)         | Fetuses-at-risk<br>calculation (per 1,000<br>fetuses-at-risk) <sup>b</sup> | RR (95% CI)         | (per 1,000 total births) <sup>c</sup> | RR (95% CI)         |
| <b>Hypertensive disorders in pregnancy<sup>d</sup></b> |                                                                              |                     |                                                                            |                     |                                       |                     |
| No                                                     | 55.9 (55.1 to 56.7)                                                          | Ref                 | 0.51 (0.50 to 0.52)                                                        | Ref                 | 1.08 (1.07 to 1.09)                   | Ref                 |
| Yes                                                    | 33.7 (32.5 to 34.9)                                                          | 0.60 (0.58 to 0.63) | 1.24 (1.20 to 1.29)                                                        | 2.44 (2.35 to 2.54) | 1.97 (1.91 to 2.02)                   | 1.83 (1.77 to 1.88) |
| <b>Maternal race/ethnicity<sup>d</sup></b>             |                                                                              |                     |                                                                            |                     |                                       |                     |
| White                                                  | 54.5 (53.6 to 55.3)                                                          | Ref                 | 0.48 (0.47 to 0.48)                                                        | Ref                 | 1.05 (1.03 to 1.06)                   | Ref                 |
| Black                                                  | 46.8 (45.7 to 48.0)                                                          | 0.86 (0.84 to 0.89) | 1.01 (0.98 to 1.03)                                                        | 2.11 (2.05 to 2.18) | 1.68 (1.65 to 1.71)                   | 1.61 (1.57 to 1.64) |
| Native American                                        | 52.4 (46.3 to 58.5)                                                          | 0.96 (0.86 to 1.08) | 0.59 (0.52 to 0.66)                                                        | 1.23 (1.09 to 1.39) | 1.31 (1.20 to 1.41)                   | 1.25 (1.15 to 1.35) |
| Asian                                                  | 47.9 (45.1 to 50.8)                                                          | 0.88 (0.83 to 0.94) | 0.40 (0.38 to 0.43)                                                        | 0.84 (0.79 to 0.90) | 0.88 (0.84 to 0.92)                   | 0.84 (0.81 to 0.88) |
| <b>Country of birth</b>                                |                                                                              |                     |                                                                            |                     |                                       |                     |
| United States                                          | 51.7 (51.0 to 52.4)                                                          | Ref                 | 0.56 (0.55 to 0.56)                                                        | Ref                 | 1.14 (1.13 to 1.15)                   | Ref                 |
| Canada                                                 | 54.4 (50.8 to 57.9)                                                          | 1.05 (0.98 to 1.12) | 0.32 (0.30 to 0.34)                                                        | 0.57 (0.53 to 0.61) | 0.60 (0.57 to 0.63)                   | 0.53 (0.50 to 0.55) |

<sup>a</sup> Births-based death rates represent proportions, with the number of early neonatal deaths at 24-31 weeks in the numerator and the number of live births at 24-31 weeks in the denominator.

<sup>b</sup> Fetuses-at-risk rates represent cumulative incidence rates with the number of early neonatal deaths at 24-31 weeks in the numerator and the number of fetuses at risk of death at 24 weeks (i.e., fetuses who were delivered at 24 weeks or later) in the denominator.

<sup>c</sup> This calculation is identical whether a births-based/fetuses-at risk calculation is used.

<sup>d</sup> Based on births in the United States.

Legend: *CI* denotes confidence intervals; *RR* denotes rate ratios.
